# Supplementary material
Source: publisher figshare collection journal article supplement (https://acs.figshare.com/ndownloader/files/3773962)
Supplement: Supplementary file 1 [file 3773962]

## Supporting Information

### **Improved *In Vivo* Performance of Amperometric Oxygen ( $PO_2$ ) Sensing Catheters via Electrochemical Nitric Oxide Generation/Release**

Hang Ren<sup>†</sup>, Megan A. Coughlin<sup>‡</sup>, Terry C. Major<sup>‡</sup>, Salvatore Aiello<sup>‡</sup>, Alvaro Rojas Pena<sup>‡</sup>, Robert H. Bartlett<sup>‡</sup>, and Mark E. Meyerhoff <sup>†\*</sup>

Departments of Chemistry<sup>†</sup> and Surgery<sup>‡</sup>, University of Michigan,  
Ann Arbor, Michigan 48109-1055, USA

\*corresponding author: Email: [mmeyerho@umich.edu](mailto:mmeyerho@umich.edu)

#### **Table of Contents**

|                                                                                                                                                 |     |
|-------------------------------------------------------------------------------------------------------------------------------------------------|-----|
| <b>Fig. S1</b> Distribution of NO around a dual lumen catheter after 900 s in the presence of air from simulation via Comsol Multiphysics®..... | S-2 |
| <b>Fig. S2</b> Calibration curve of $PO_2$ sensing catheters on the benchtop with NO release switched “on” and “off” .....                      | S-3 |
| <b>Fig. S3</b> Stability of the $PO_2$ sensing catheters over 3d.....                                                                           | S-3 |
| <b>Fig. S4</b> Typical reversible response of the $PO_2$ sensing catheter under investigation.....                                              | S-4 |
| <b>Fig. S5</b> NO release profile from a electrochemical NO generation/release $PO_2$ sensing catheter.....                                     | S-4 |

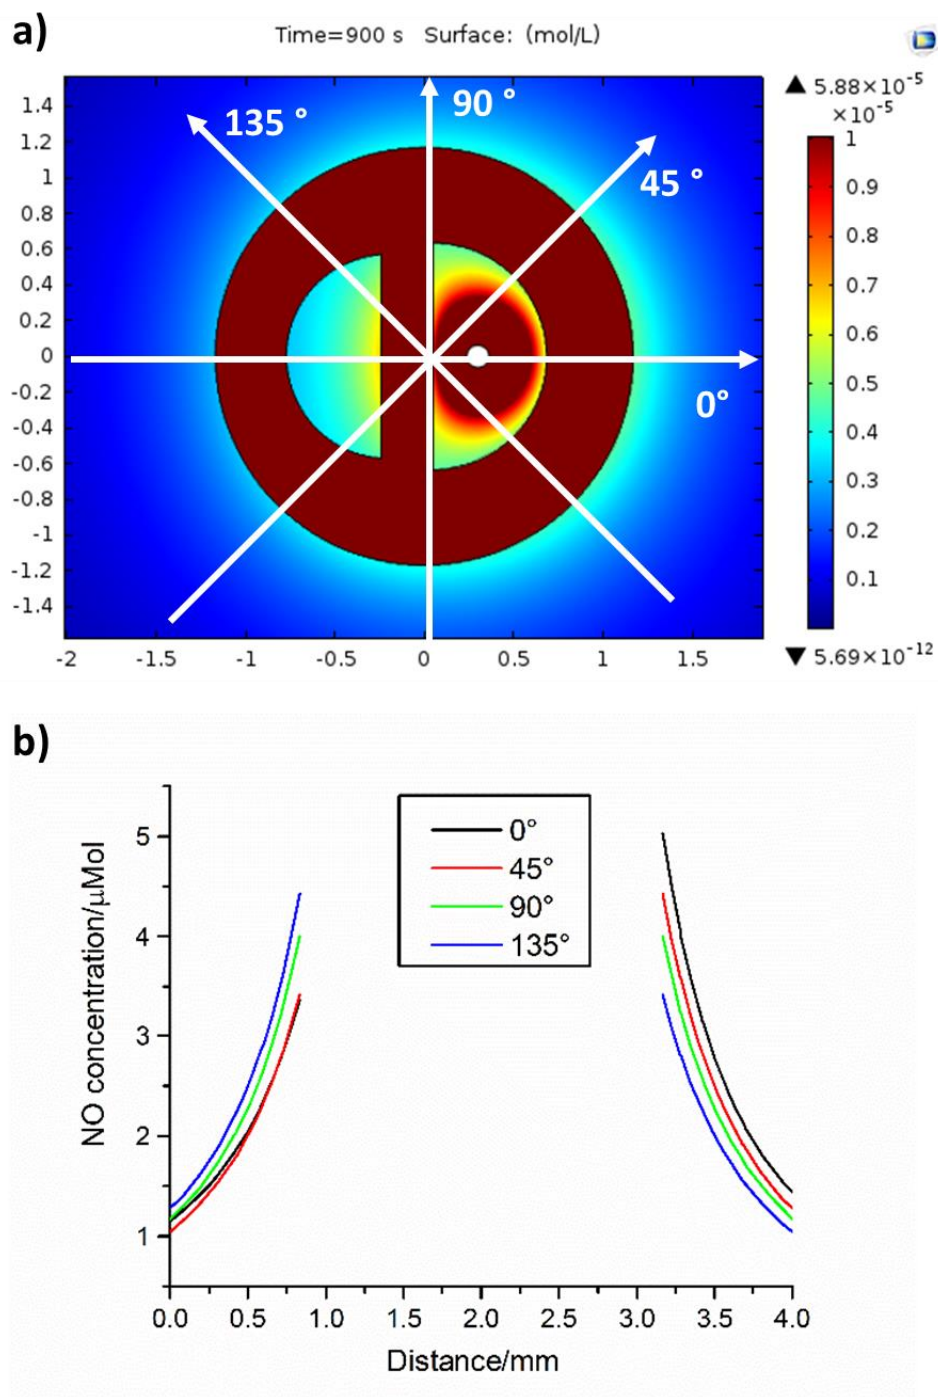

**Fig. S1.** Distribution of NO levels around a dual lumen catheter after 900 s in the presence of air from simulation via Comsol Multiphysics®: a) Concentration color map near catheter surface; b) concentration of NO outside the catheter along the lines dissecting the catheter at 0°, 45°, 90° and 135°, as indicated in a).

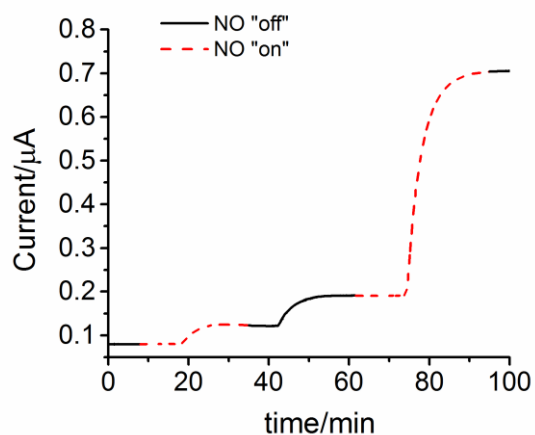

**Fig. S2.** Calibration curve of  $PO_2$  sensing catheters on the benchtop with NO generation/release switched “on” and “off” as indicated.

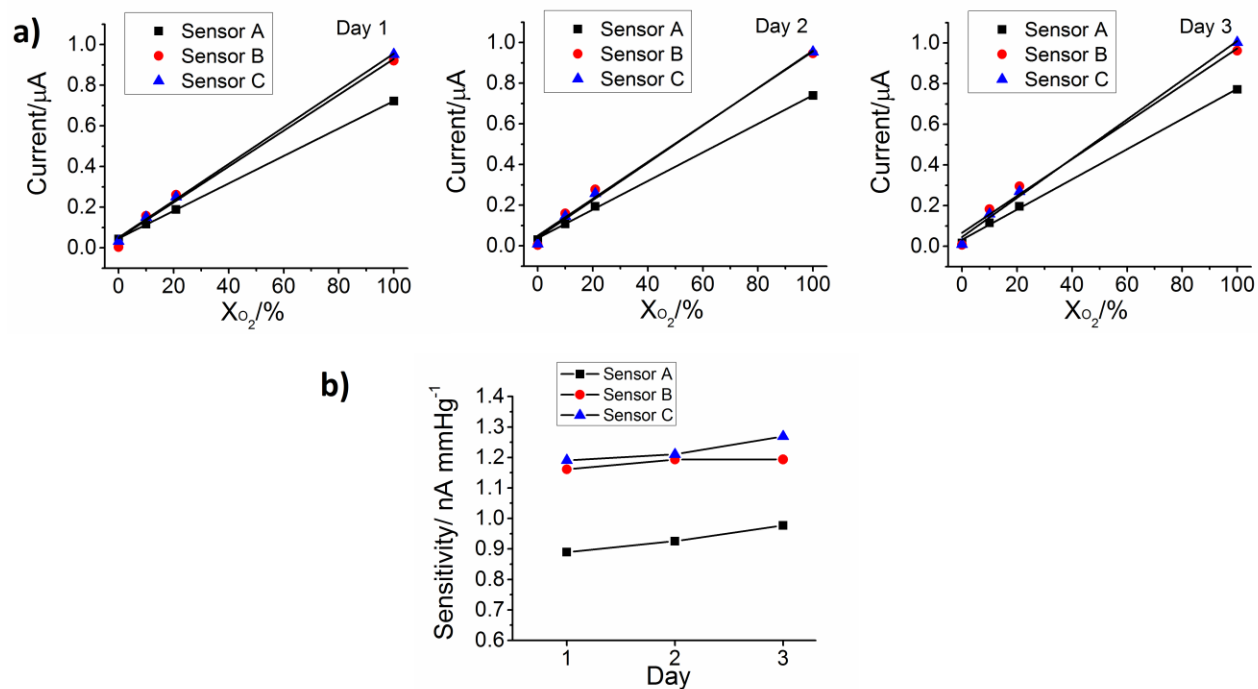

**Fig. S3.** Stability of the  $PO_2$  sensing catheters over 3d: a) calibration curve of three sensors on different days with continuous NO generation/release; b) summary of the change in sensitivity over 3 d period for each of the three sensors.

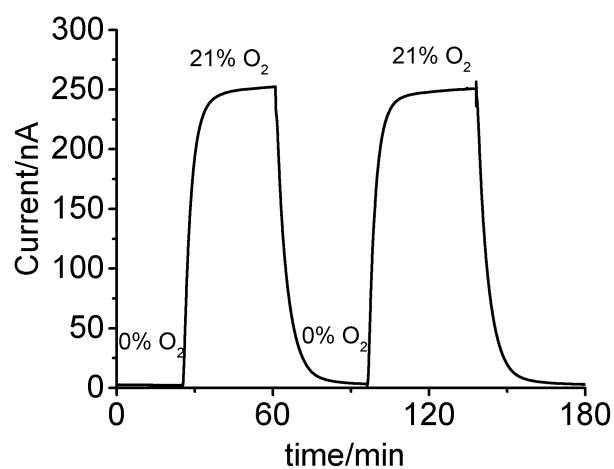

**Fig. S4.** Typical reversible response of the electrochemical NO generator  $PO_2$  sensing catheter under investigation.

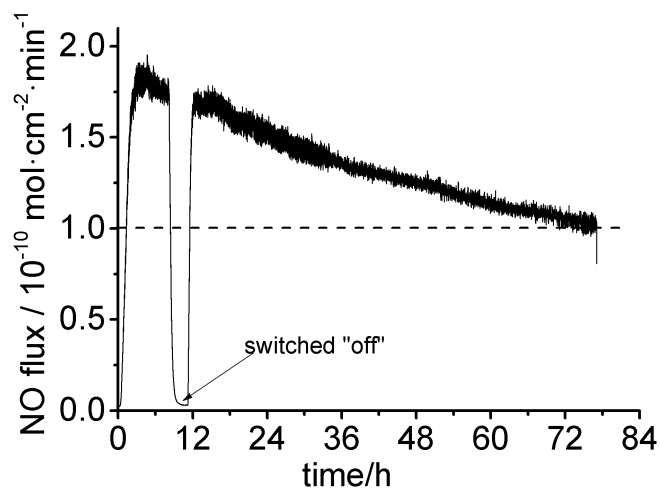

**Fig. S5.** NO release profile from an electrochemical NO generation/release  $PO_2$  sensing catheter. NO release is switched "off" at ~ the 8<sup>th</sup> h to demonstrate the control of the release.
